# Supplementary material for: Effects of Taurine on Gut Microbiota Homeostasis: An Evaluation Based on Two Models of Gut Dysbiosis
Source: MDPI journal article supplement (doi:10.3390/biomedicines11041048), 2023-03-29
Supplement: s1 [file s1]

## **Supporting Information for**

### **Effects of taurine on gut microbiota homeostasis:**

### **An evaluation based on two models of gut dysbiosis**

Weike Qian<sup>1,2</sup>, Mingyang Li<sup>1,2</sup>, Leilei Yu<sup>1,2</sup>, Fengwei Tian<sup>1,2</sup>, Jianxin Zhao<sup>1,2</sup>, Qixiao Zhai<sup>1,2,\*</sup>

1 State Key Laboratory of Food Science and Technology, Jiangnan University, Wuxi, Jiangsu 214122 P. R China

2 School of Food Science and Technology, Jiangnan University, Wuxi, Jiangsu 214122, China.

\*Corresponding Author: Qixiao Zhai

E-mail addresses: [zhaiqixiao@jiangnan.edu.cn](mailto:zhaiqixiao@jiangnan.edu.cn)

The file includes:

Table S1 to S4

**Table S1.** The elution gradient

| Time (min) | A      | B       |
|------------|--------|---------|
| 0          | 80%    | 20%     |
| 0-6        | 80-40% | 20-60%  |
| 6-25       | 0%     | 100%    |
| 25-26      | 0%     | 100%    |
| 26-28      | 0-50%  | 100-50% |
| 28-30      | 50-80% | 50-20%  |
| 30-32      | 80%    | 20%     |

Flow rate of 0.3 mL/min, column temperature was maintained at 30°C.

**Table S2.** Aldex2 analysis of differences in the microbial taxa between Taurine and Control I group. Positive values indicate higher abundances in Taurine group, while negative values correspond to higher abundances in Control I group.

| Name                               | Effect   | Name                                     | Effect   |
|------------------------------------|----------|------------------------------------------|----------|
| <i>Rikenellaceae RC9 gut group</i> | 0.82418  | <i>Alistipes</i>                         | -1.18895 |
| <i>Bifidobacterium</i>             | 0.757043 | <i>Ruminococcaceae UCG-014</i>           | -0.68847 |
| <i>Intestinimonas</i>              | 0.623993 | <i>unidentified rumen bacterium RF32</i> | -0.67556 |
| <i>Catabacter</i>                  | 0.577016 | <i>Hungatella</i>                        | -0.66442 |
| <i>Parabacteroides</i>             | 0.561738 | <i>[Eubacterium] fissicatena group</i>   | -0.59929 |
| <i>Bilophila</i>                   | 0.561361 | <i>Ruminococcaceae UCG-010</i>           | -0.59161 |
| <i>Butyricimonas</i>               | 0.499737 | <i>Phascolarctobacterium</i>             | -0.58475 |
| <i>ASF356</i>                      | 0.443217 | <i>Ruminococcaceae NK4A214 group</i>     | -0.50662 |

**Table S3.** Aldex2 analysis of differences in the microbial taxa between Antibiotic-Tau and Antibiotic group. Positive values indicate higher abundances in Antibiotic-Tau, while negative values correspond to higher abundances in Antibiotic group.

| Name                  | Effect   | Name                                | Effect   |
|-----------------------|----------|-------------------------------------|----------|
| <i>Lactobacillus</i>  | 1.547984 | <i>Erysipelatoclostridium</i>       | -1.05332 |
| <i>Enterobacter</i>   | 1.082583 | <i>[Ruminococcus] torques group</i> | -0.97657 |
| <i>Proteus</i>        | 0.808426 | <i>Alistipes</i>                    | -0.42612 |
| f__Enterobacteriaceae | 0.691757 | <i>uncultured bacterium</i>         | -0.42288 |
| <i>Enterococcus</i>   | 0.492112 |                                     |          |
| <i>Akkermansia</i>    | 0.434226 |                                     |          |

**Table S4.** Aldex2 analysis of differences in the microbial taxa between C.R-Tau and C.R group. Positive values indicate higher abundances in C.R-Tau, while negative values correspond to higher abundances in C.R group.

| Name                            | Effect   | Name                                         | Effect   |
|---------------------------------|----------|----------------------------------------------|----------|
| <i>Morganella</i>               | 4.401302 | <i>Akkermansia</i>                           | -4.88299 |
| <i>Proteus</i>                  | 4.07961  | <i>Erysipelatoclostridium</i>                | -1.64422 |
| <i>Escherichia-Shigella</i>     | 1.539724 | f__Enterobacteriaceae                        | -1.19842 |
| <i>Family XIII AD3011 group</i> | 0.805517 | <i>Lactobacillus</i>                         | -1.05555 |
| <i>Bacteroides</i>              | 0.701172 | f__Muribaculaceae                            | -0.91965 |
| <i>Stenotrophomonas</i>         | 0.658571 | f__Erysipelotrichaceae;g__uncultured         | -0.88847 |
|                                 |          | [ <i>Clostridium</i> ] <i>innocuum group</i> | -0.82702 |
|                                 |          | f__Lachnospiraceae                           | -0.68934 |
